# Supplementary material for: Exceptional activity of gallium(iii) chloride and chlorogallate(iii) ionic liquids for Baeyer–Villiger oxidation
Source: Royal Society of Chemistry journal article supplement (doi:10.1039/c6ra03435g), 2016-01-01

## **Exceptional activity of gallium(III) chloride and chlorogallate(III) ionic liquids for Baeyer-Villiger oxidation**

*Magdalena Markiton,<sup>a</sup> Anna Chrobok,<sup>a\*</sup> Karolina Matuszek<sup>a</sup>, Kenneth R. Seddon<sup>b</sup> and Małgorzata Swadźba-Kwaśny<sup>b\*</sup>*

### **Supplementary information:**

#### **NMR spectra of synthesized ketones and lactones.**

<sup>1</sup>H NMR spectra were recorded in CDCl<sub>3</sub> with TMS as internal standard at 300 MHz or 600 MHz and <sup>13</sup>C NMR at 75 or 150 MHz (Varian system), respectively.

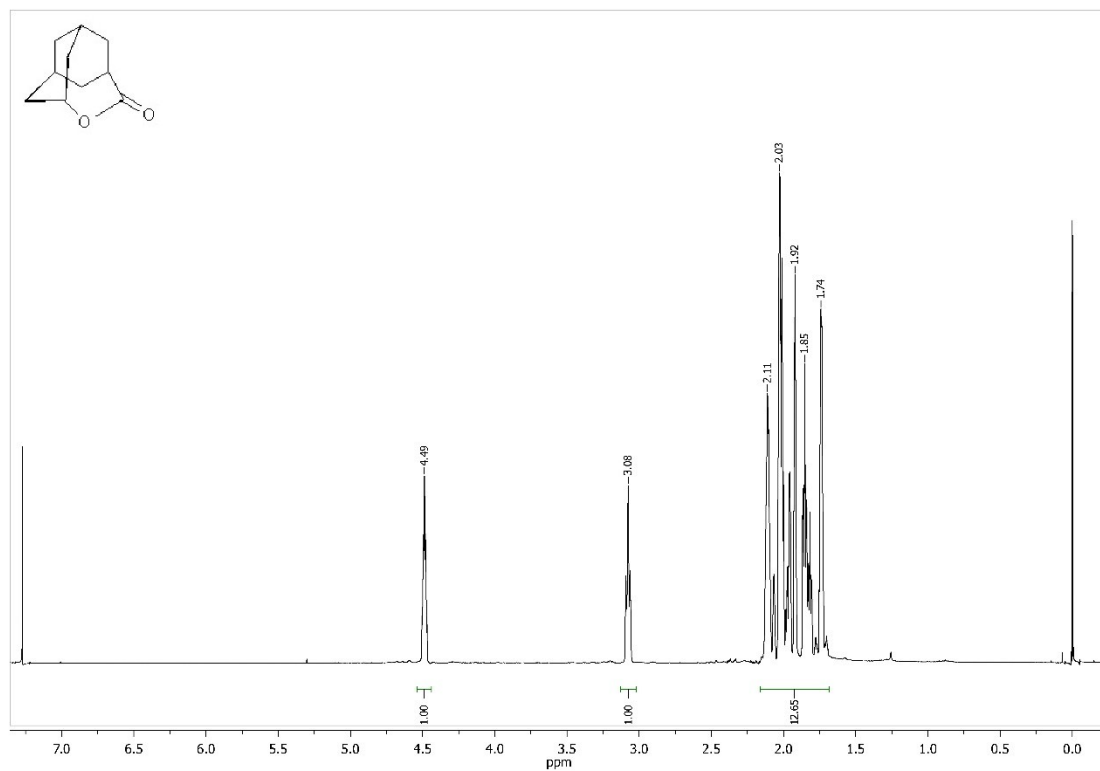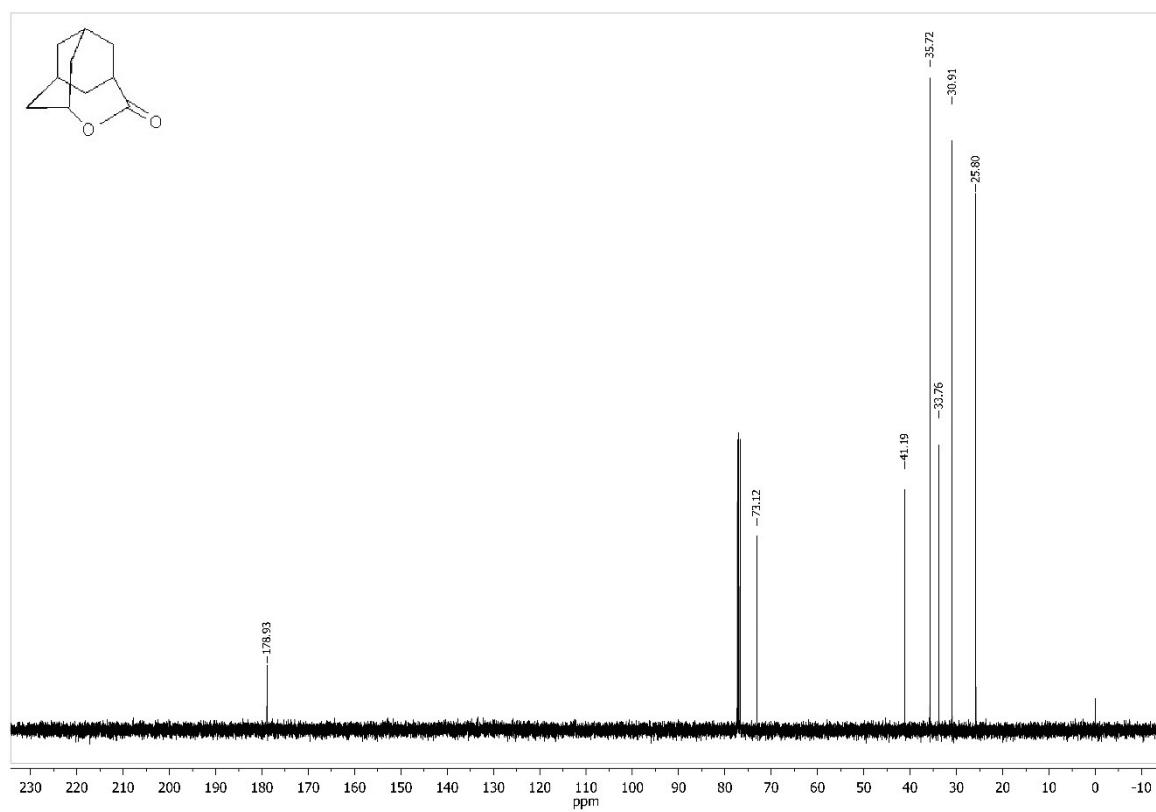

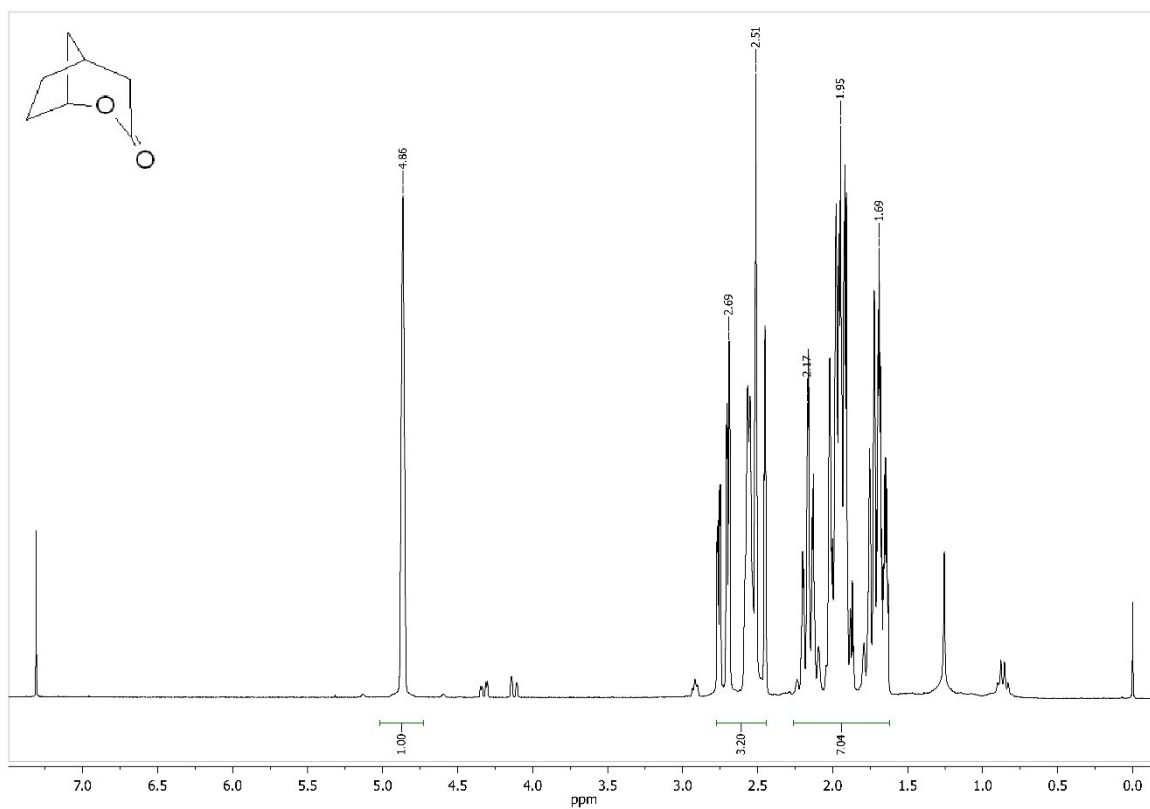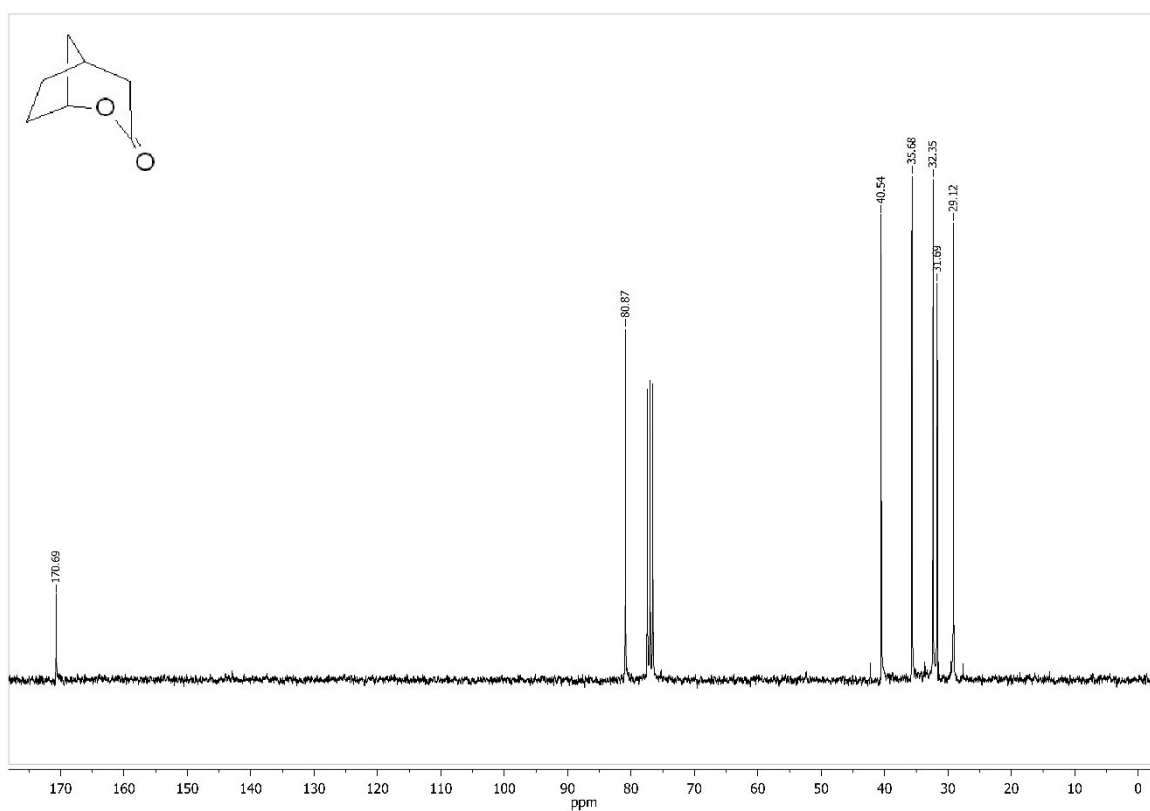

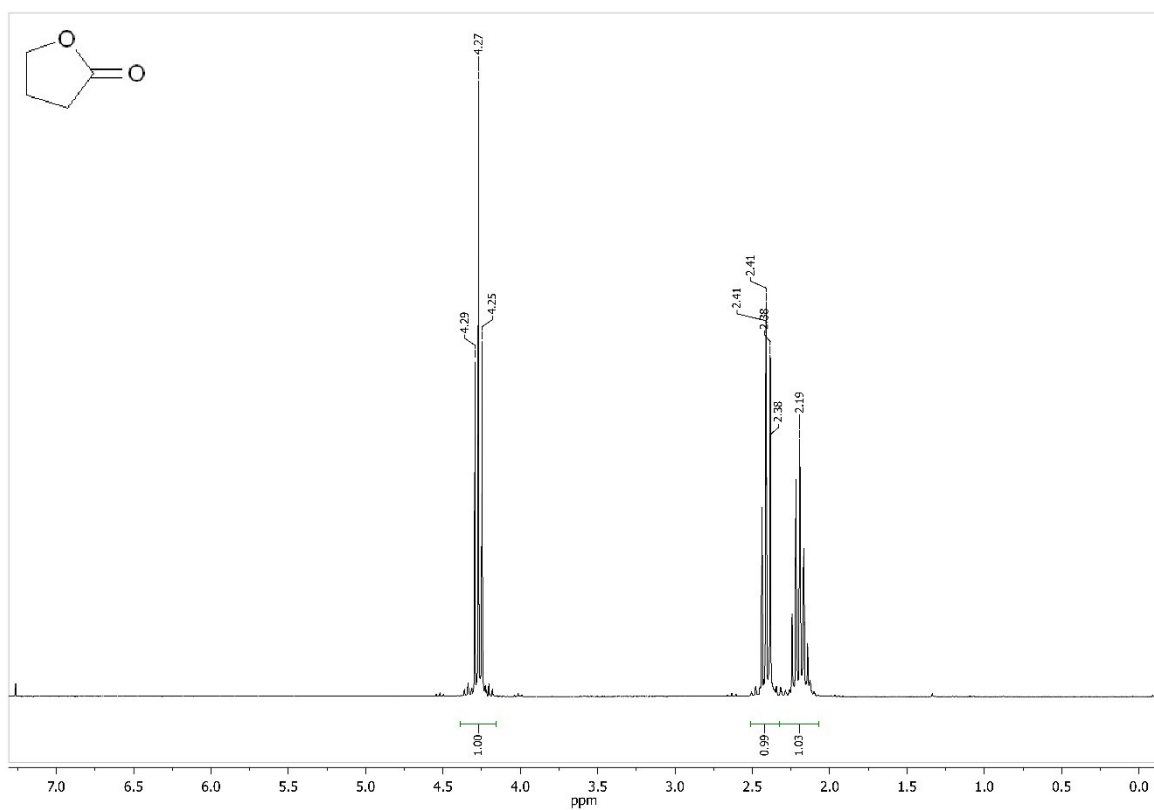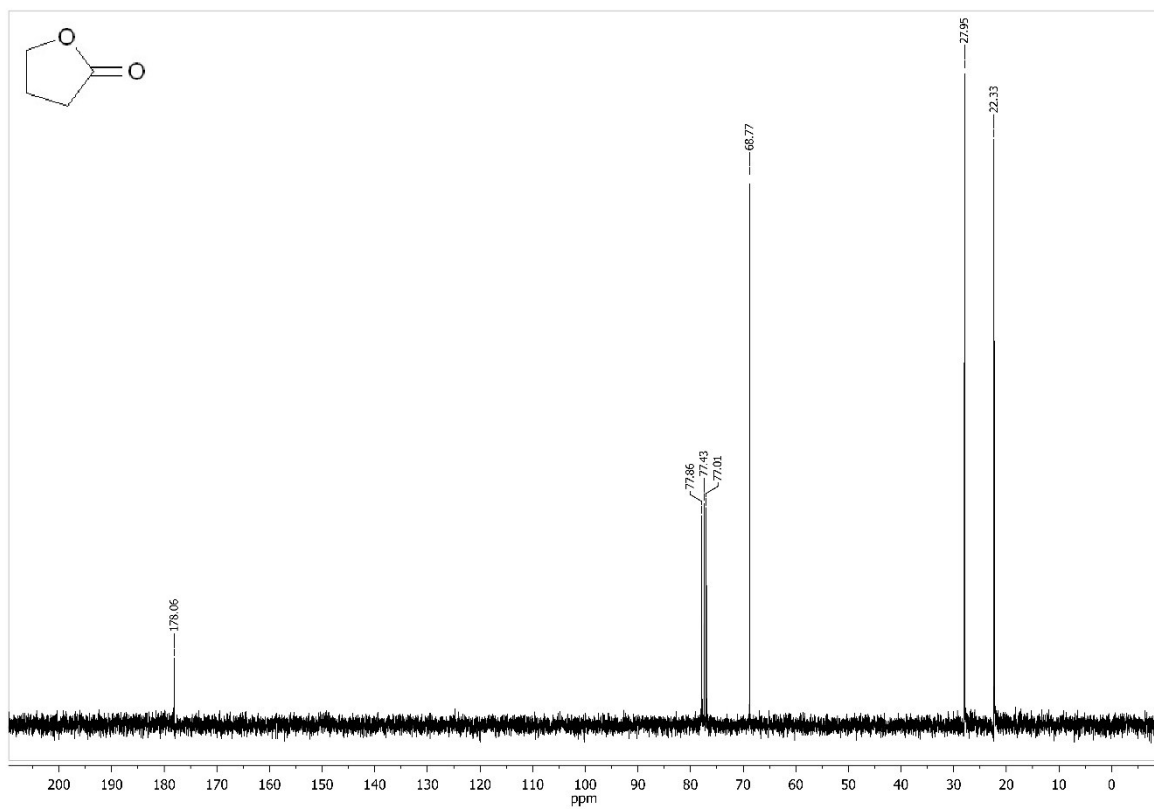

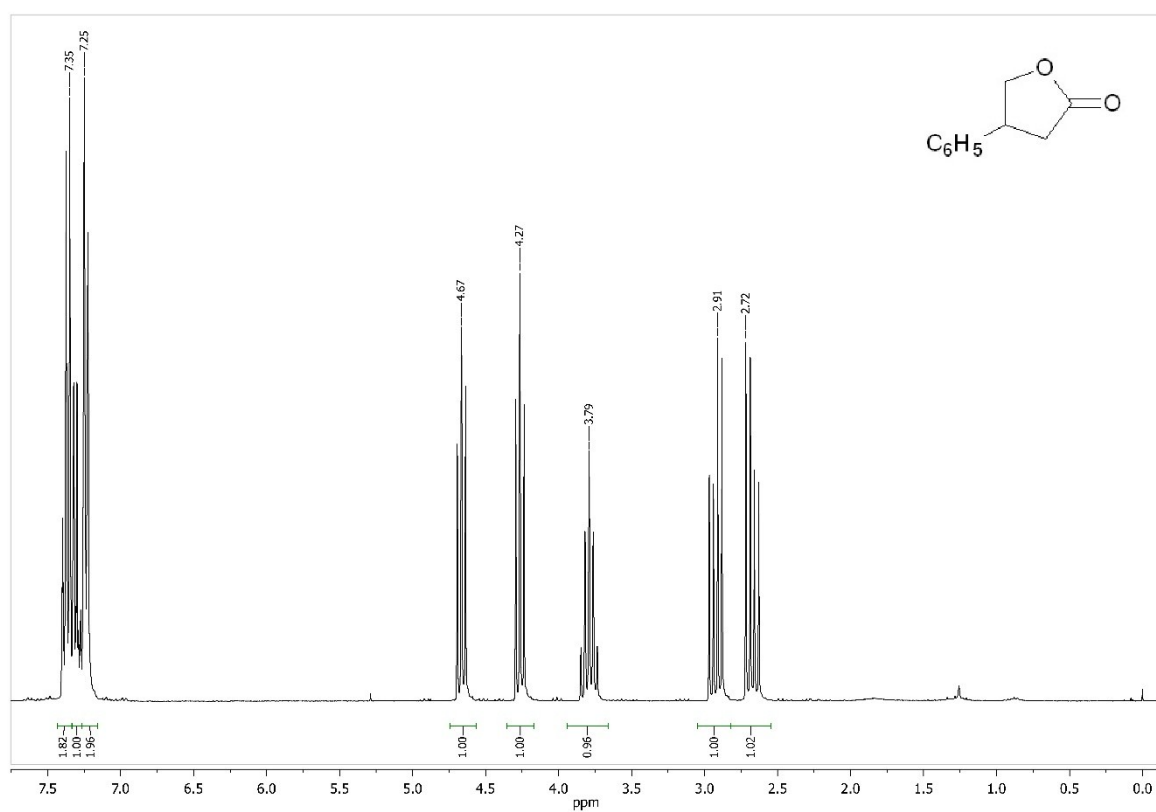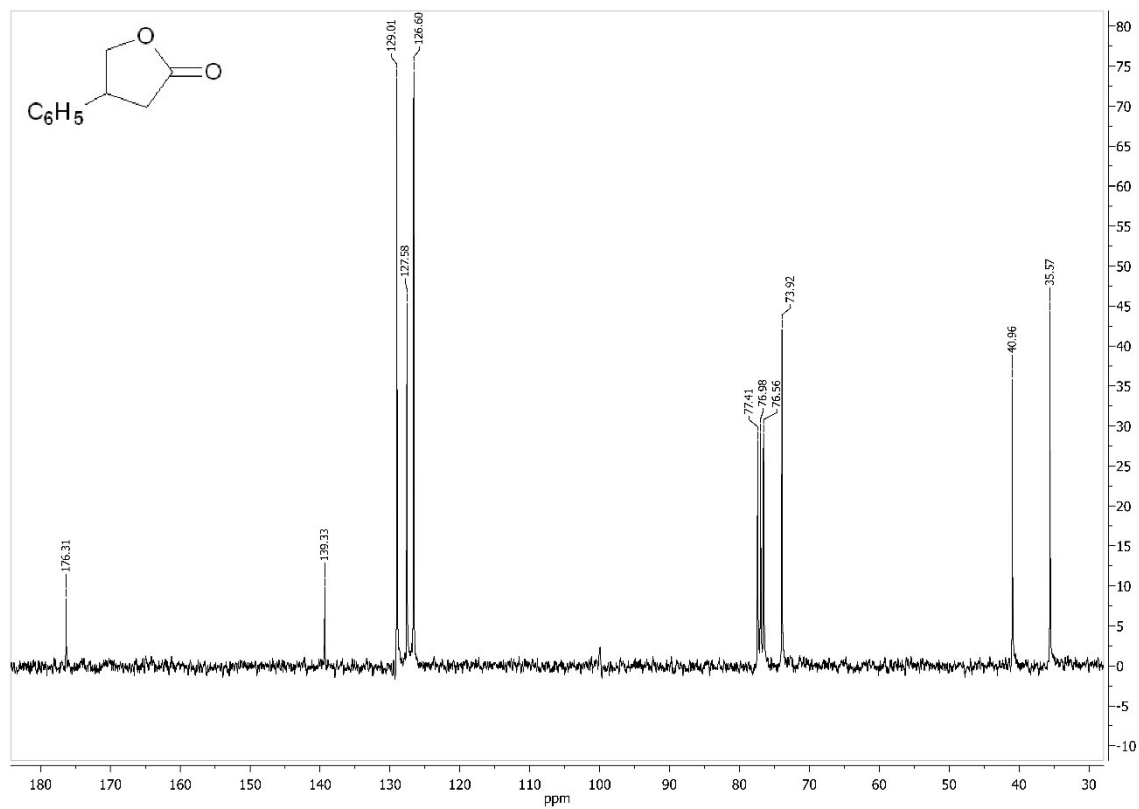

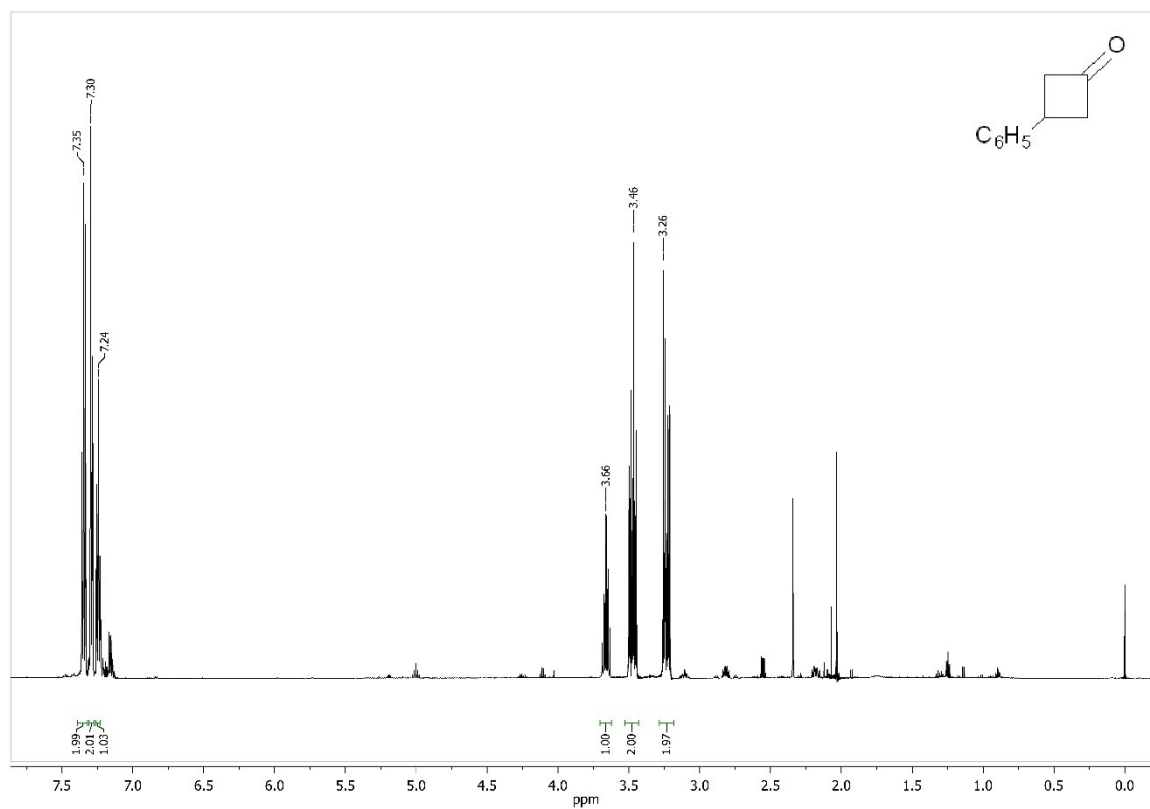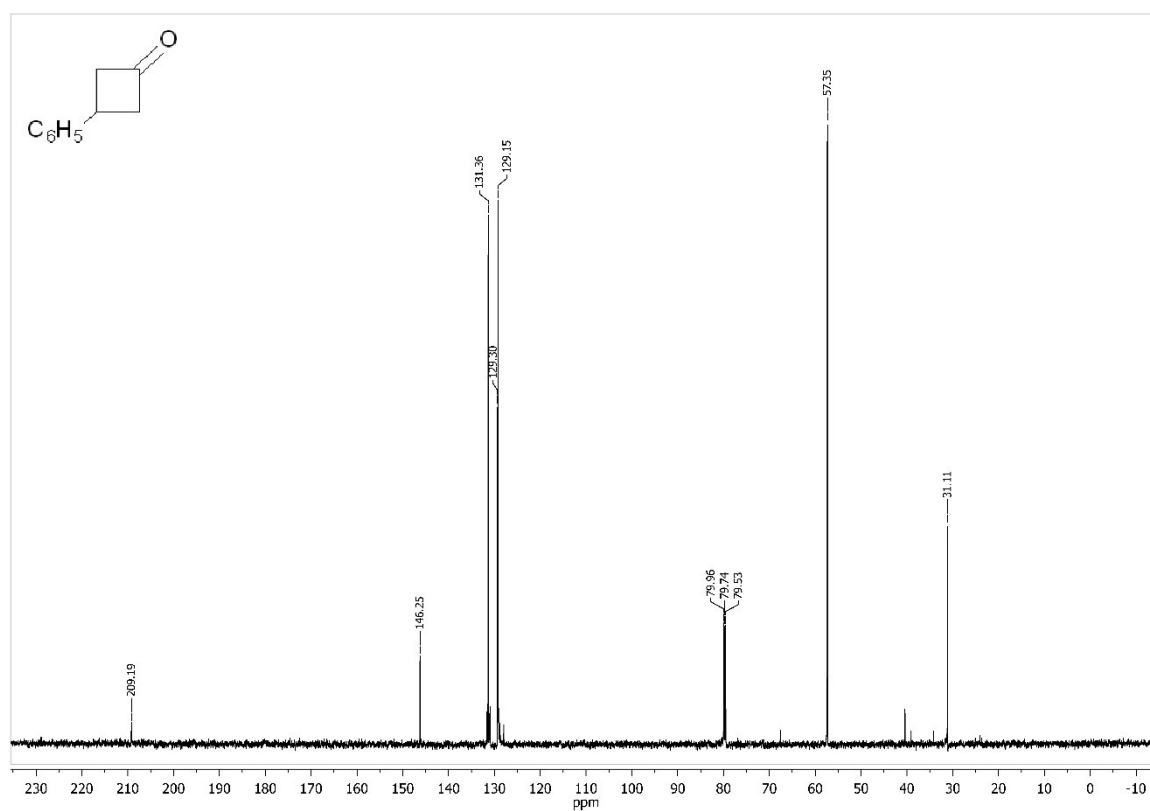

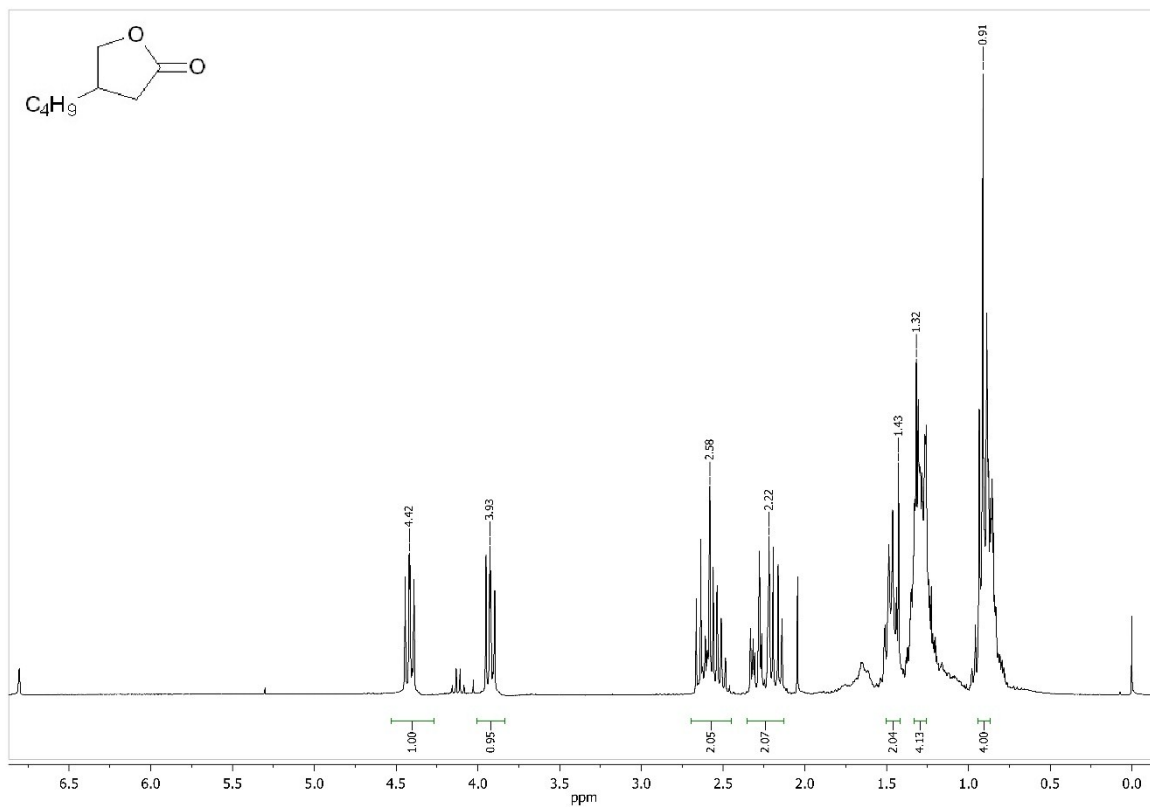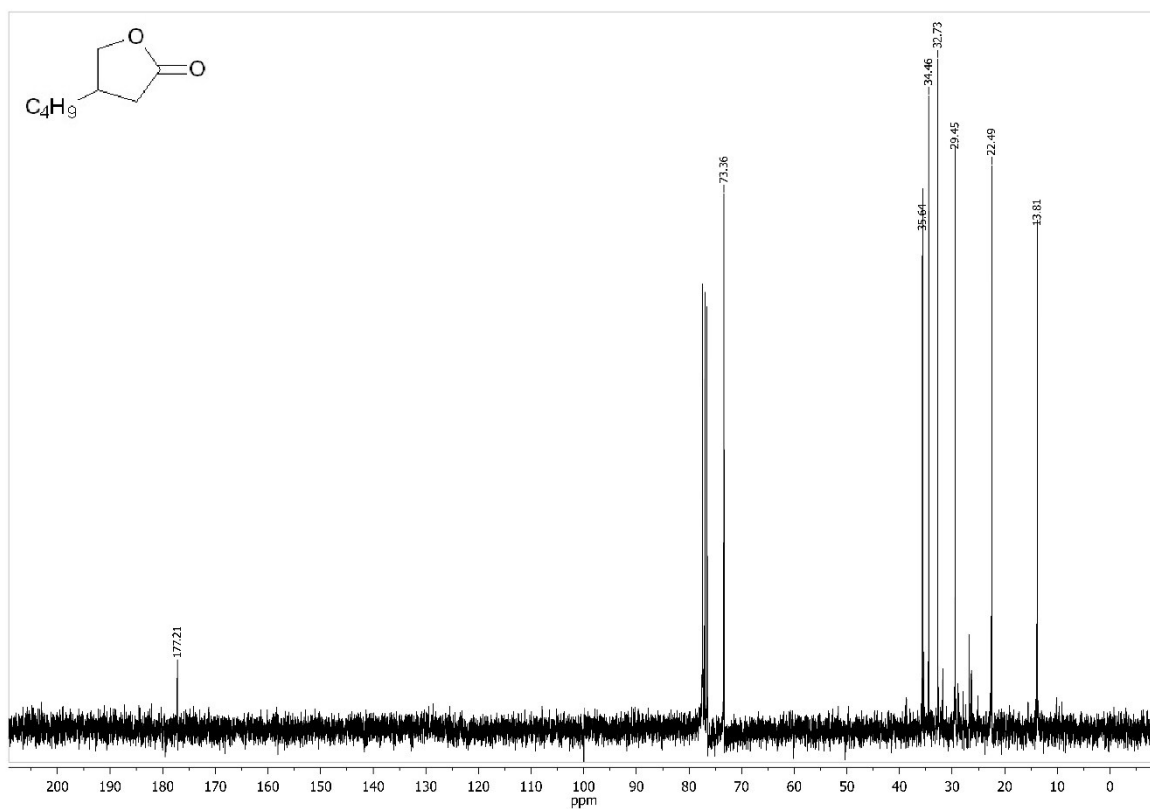

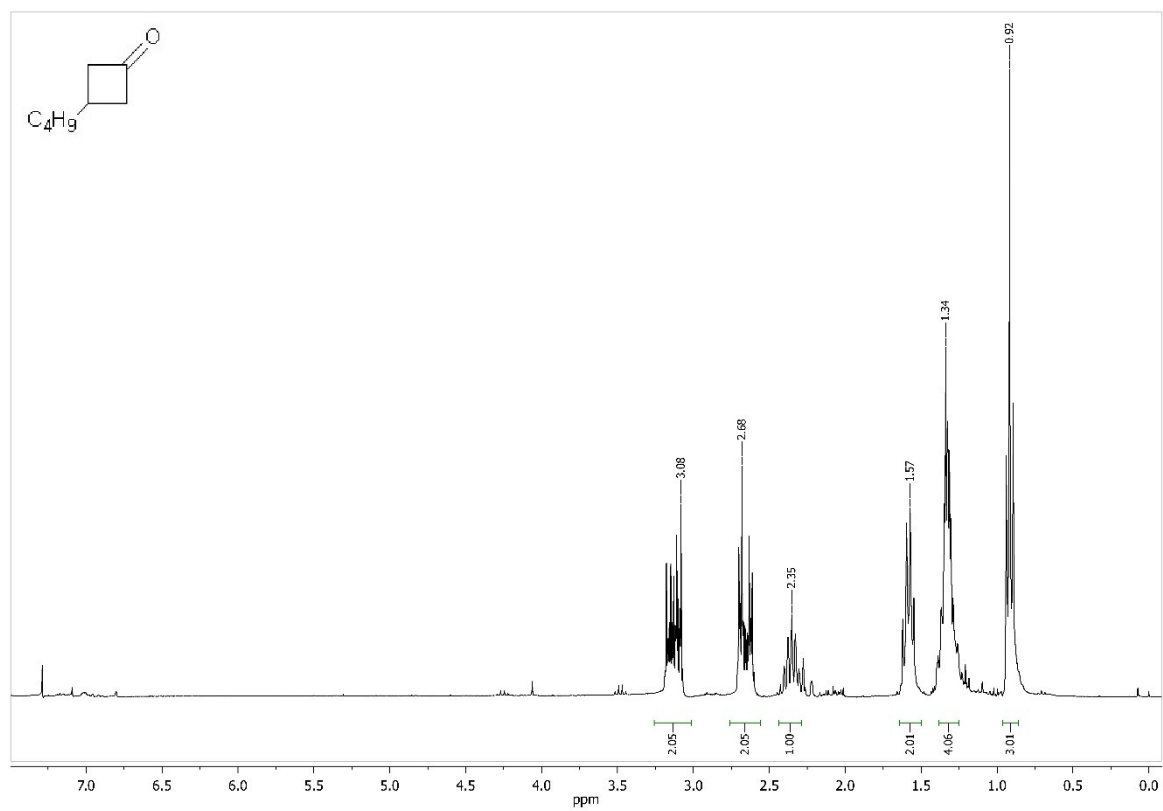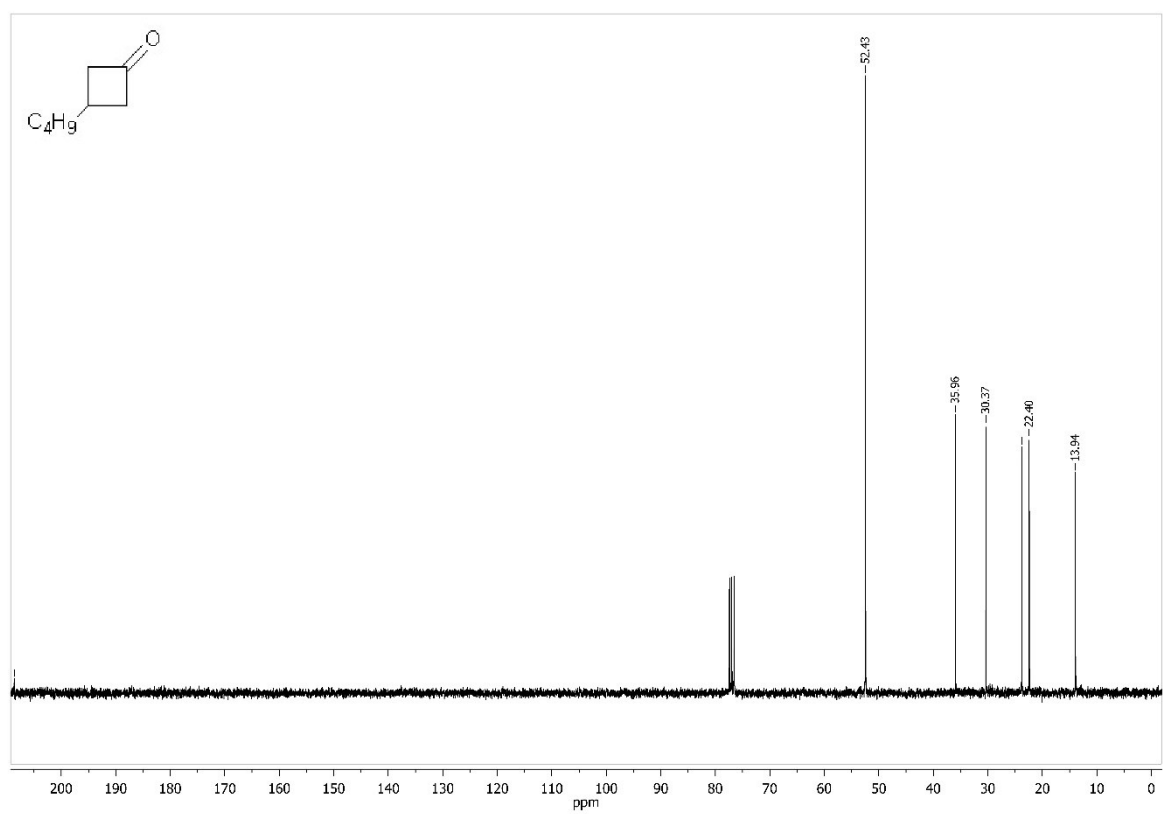



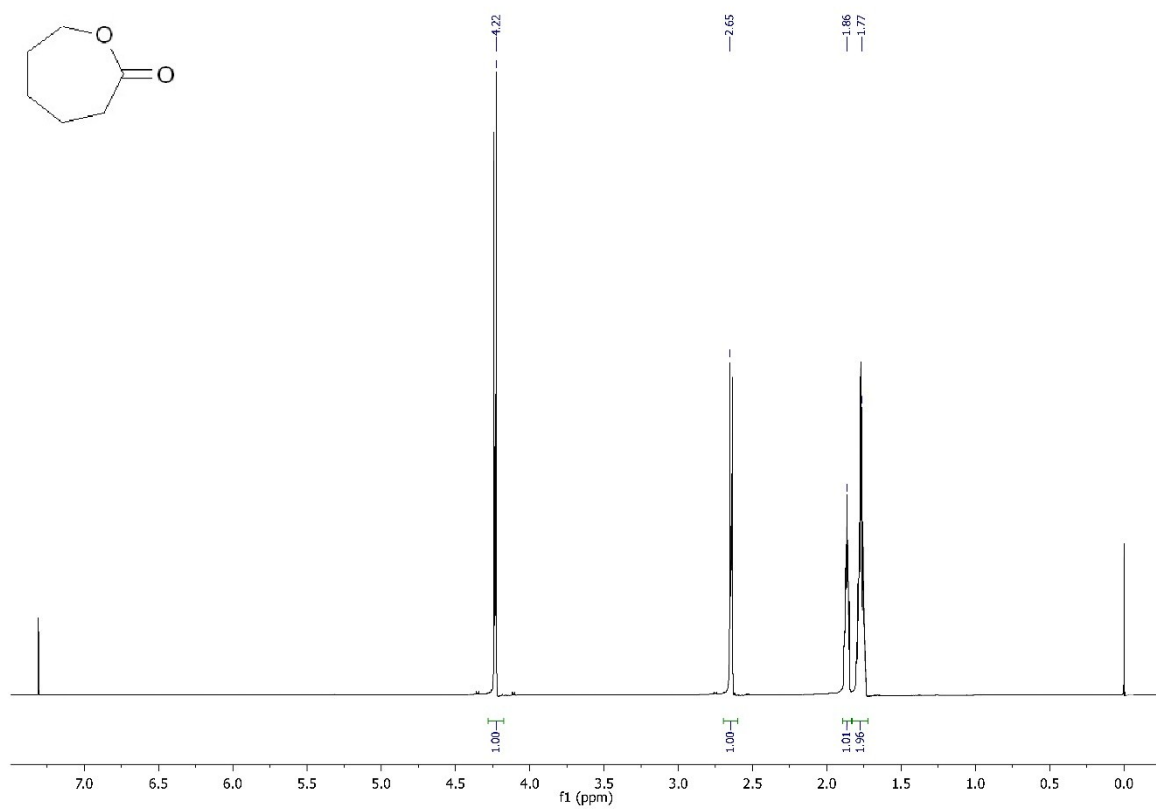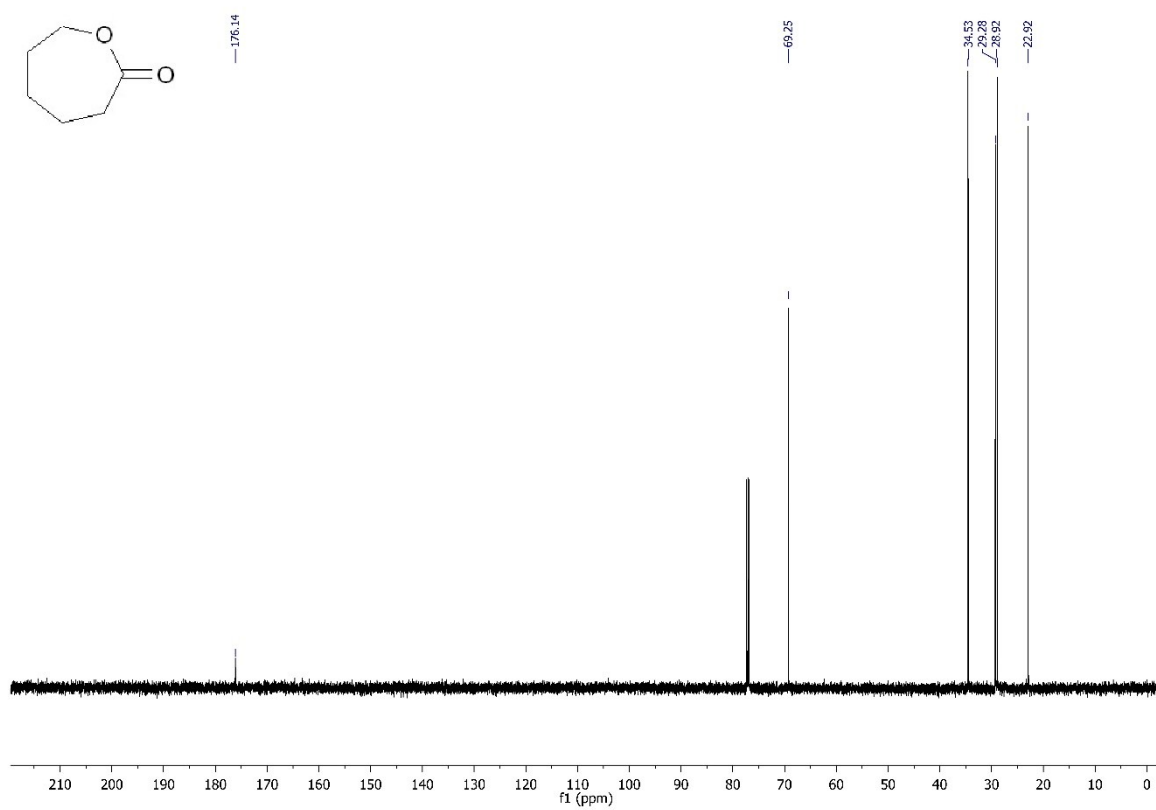

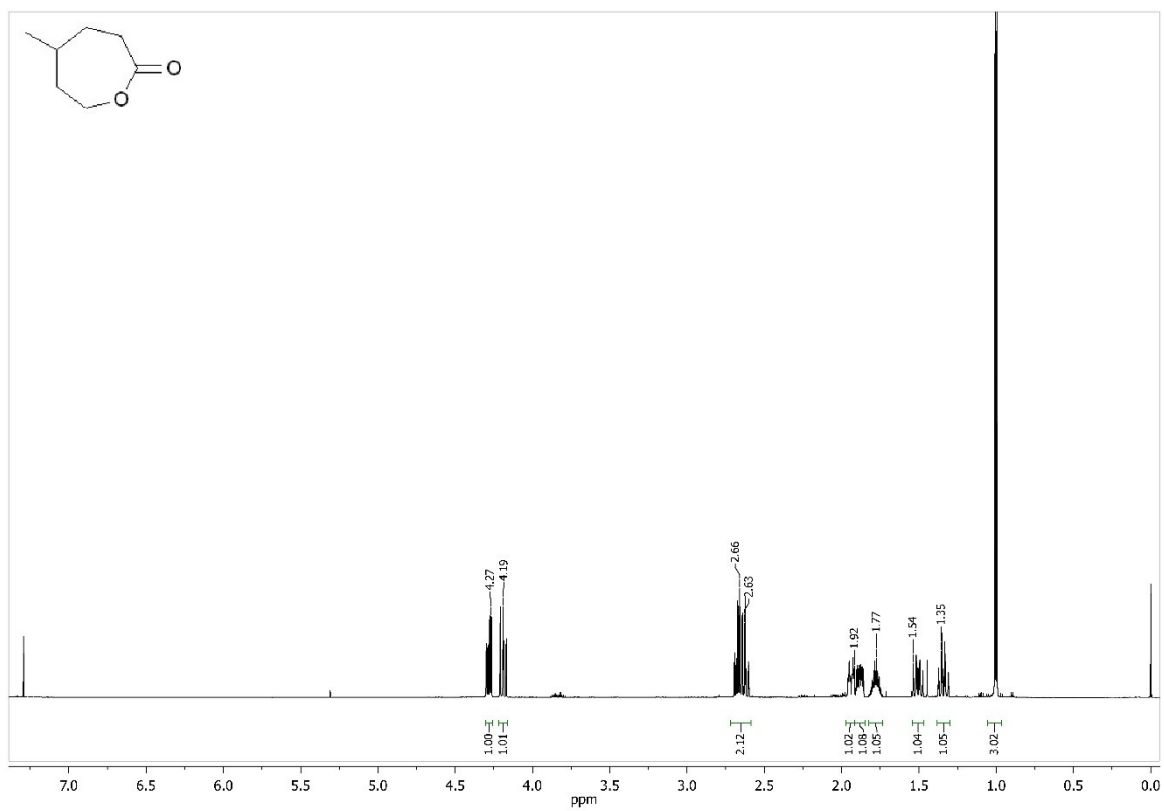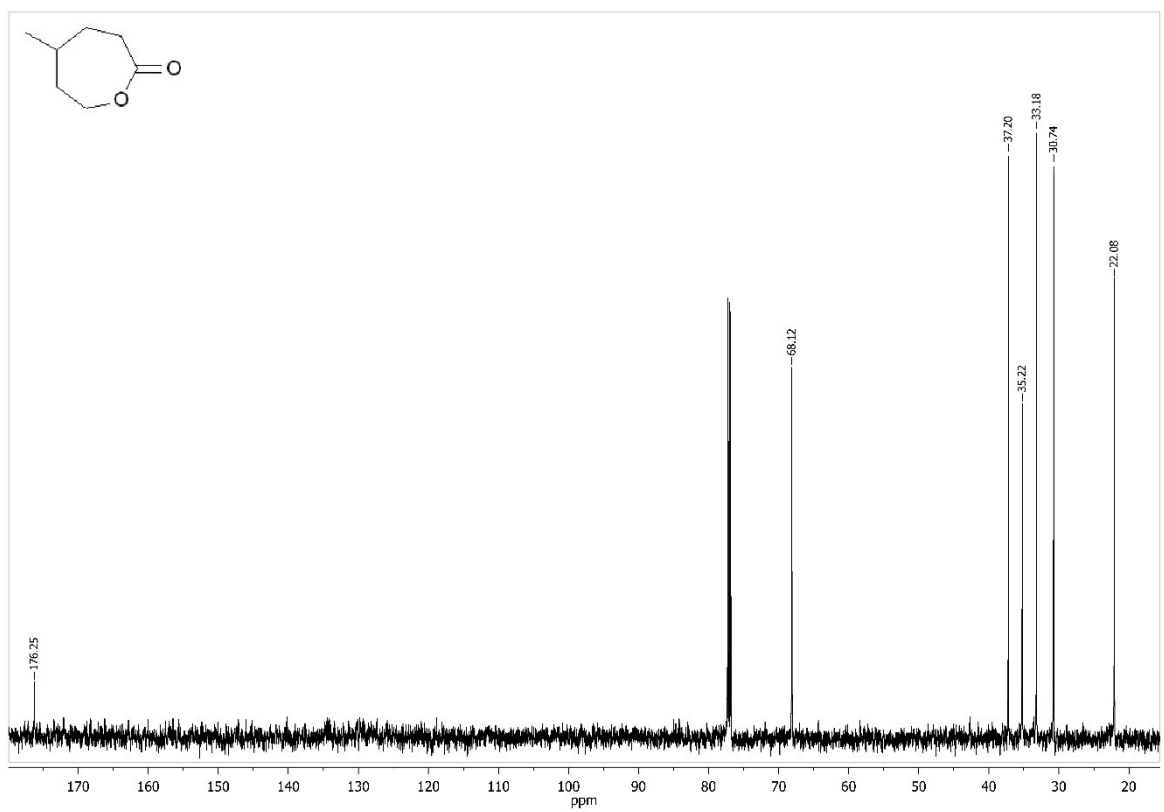

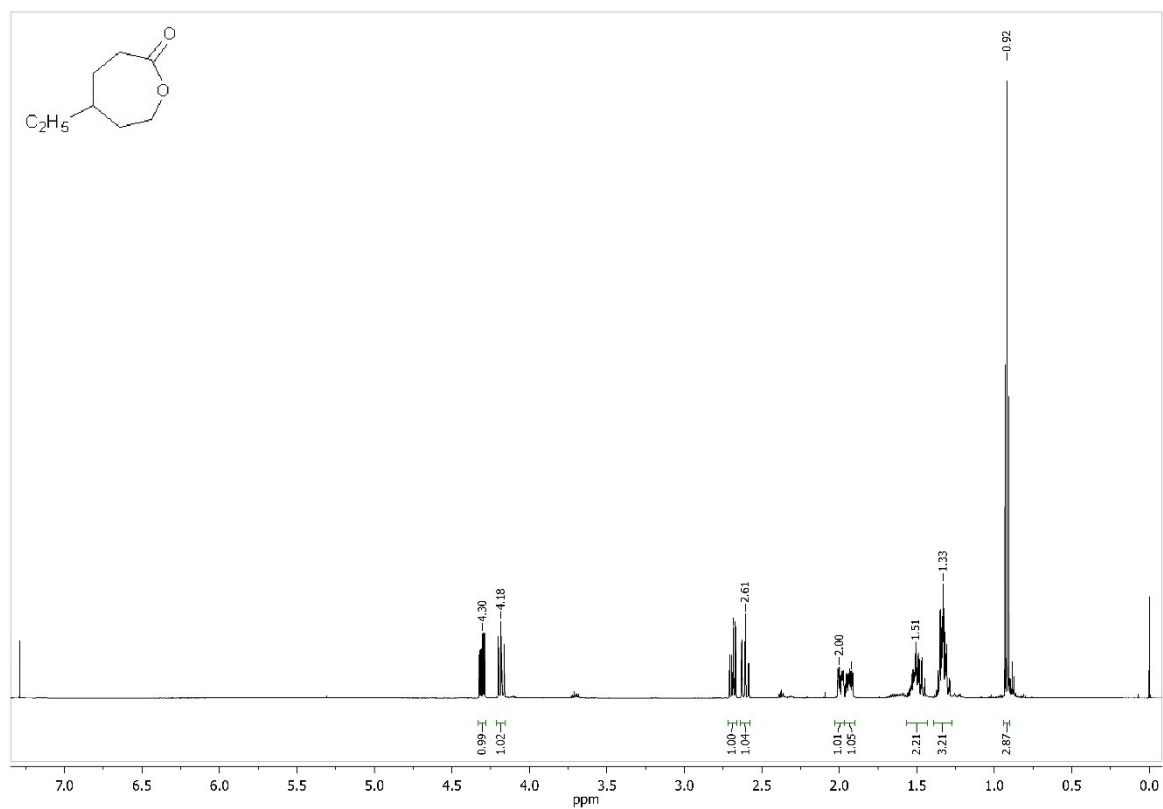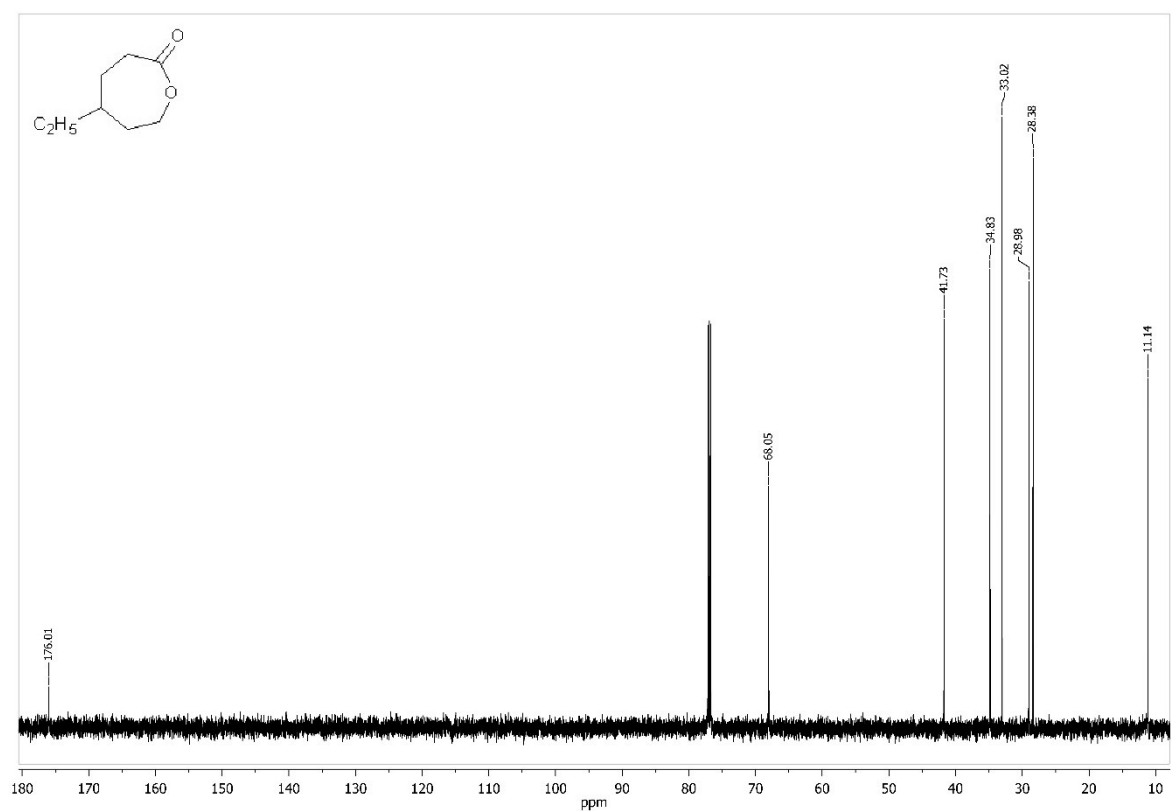

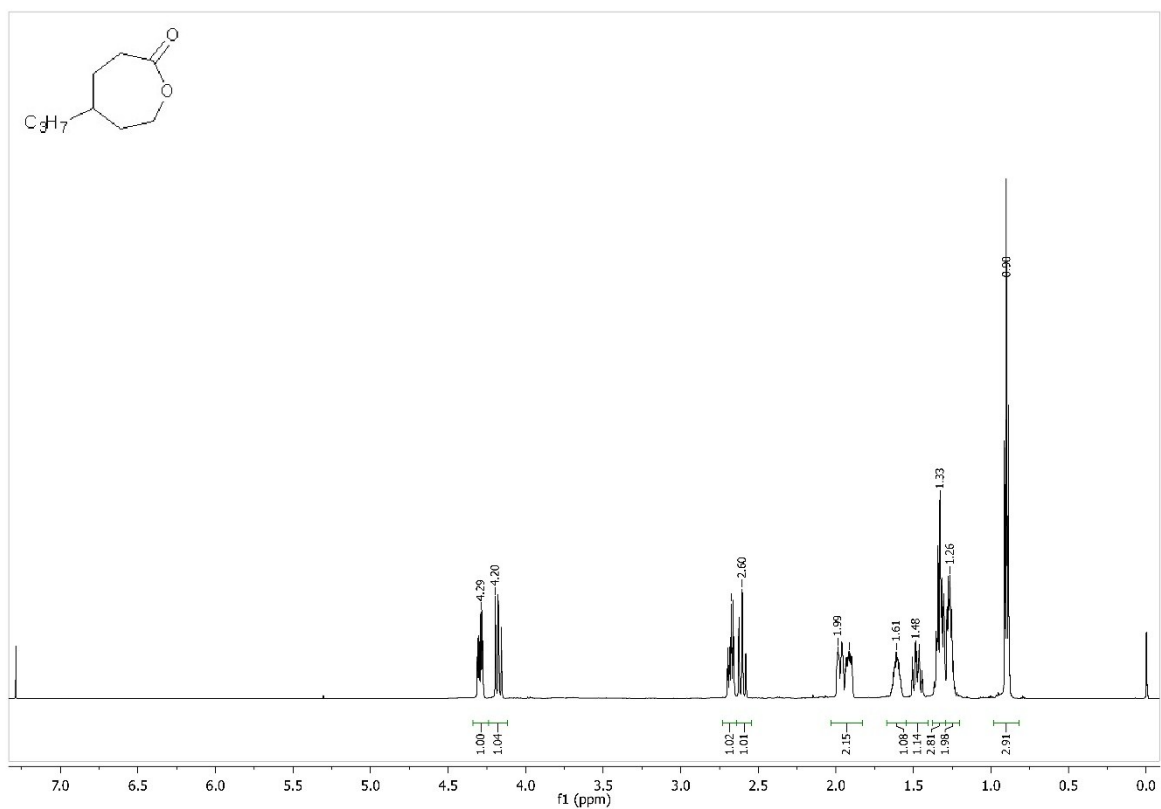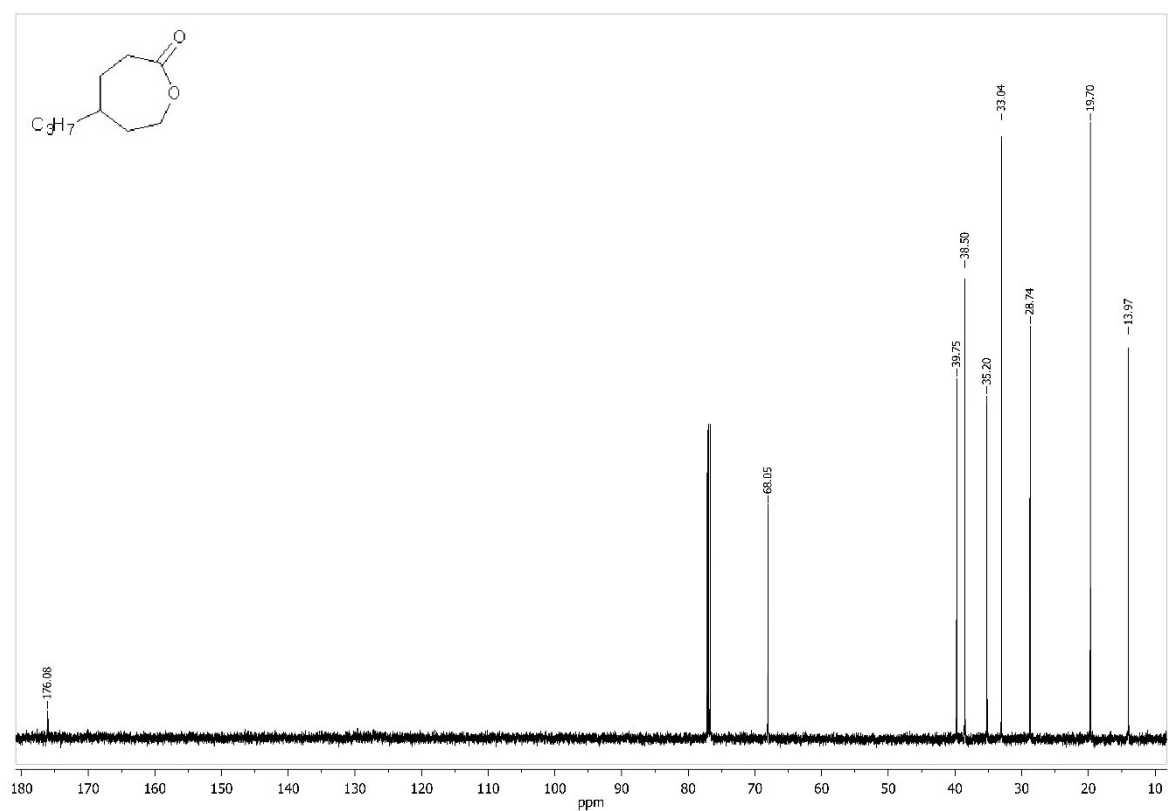

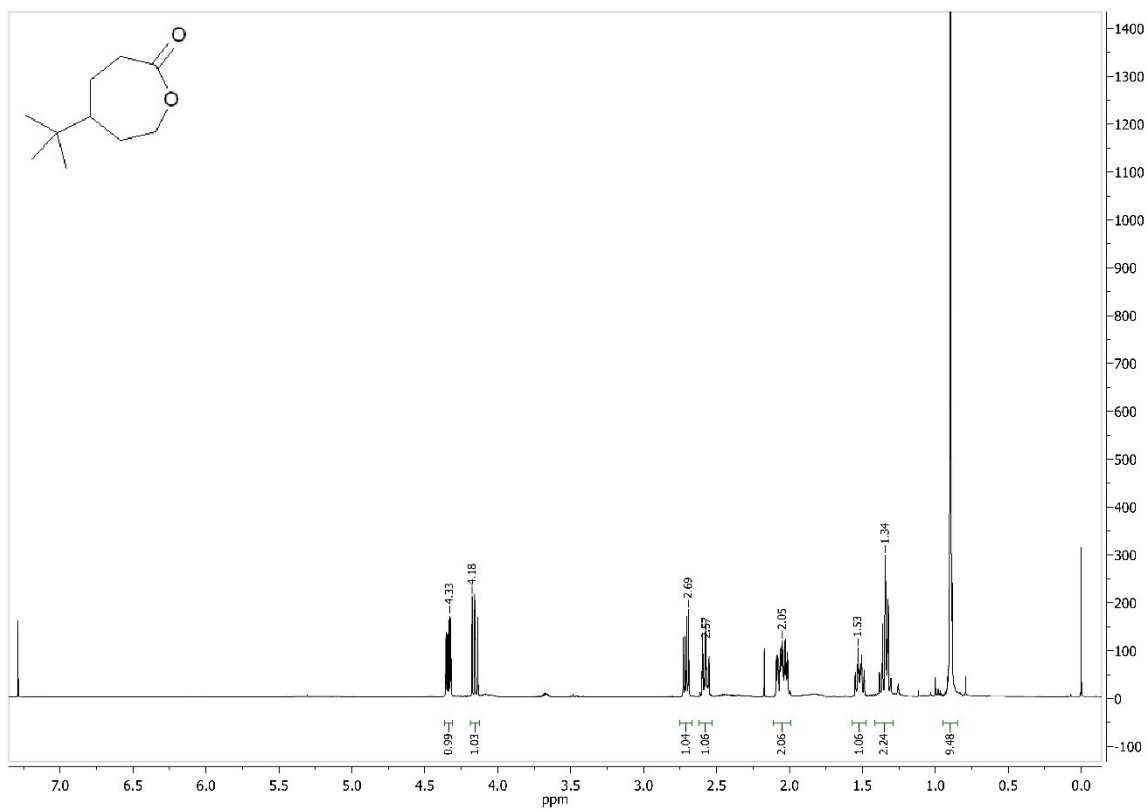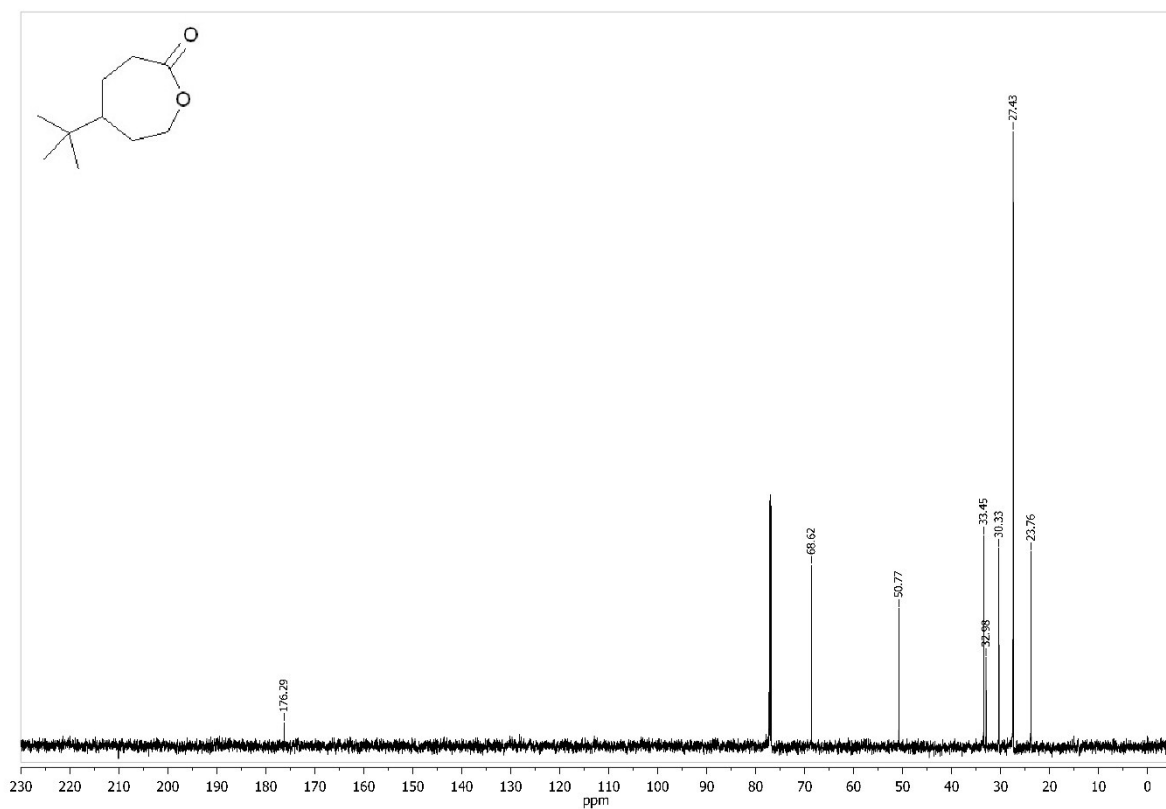

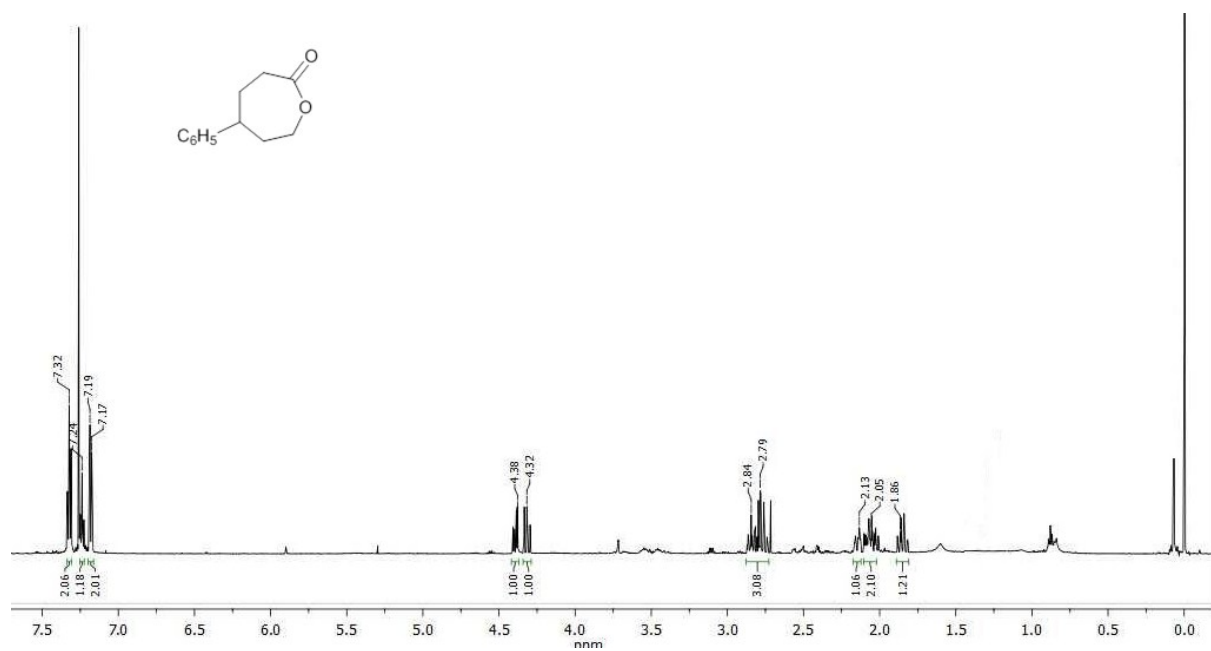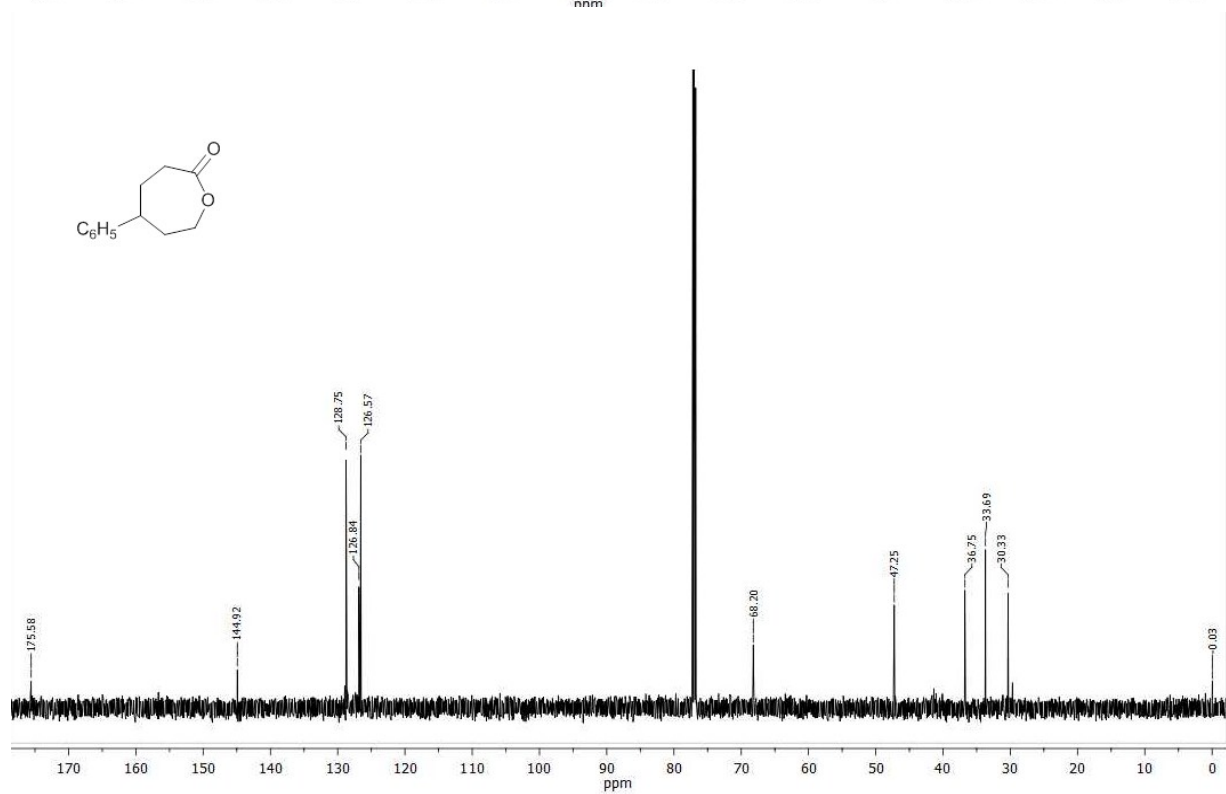

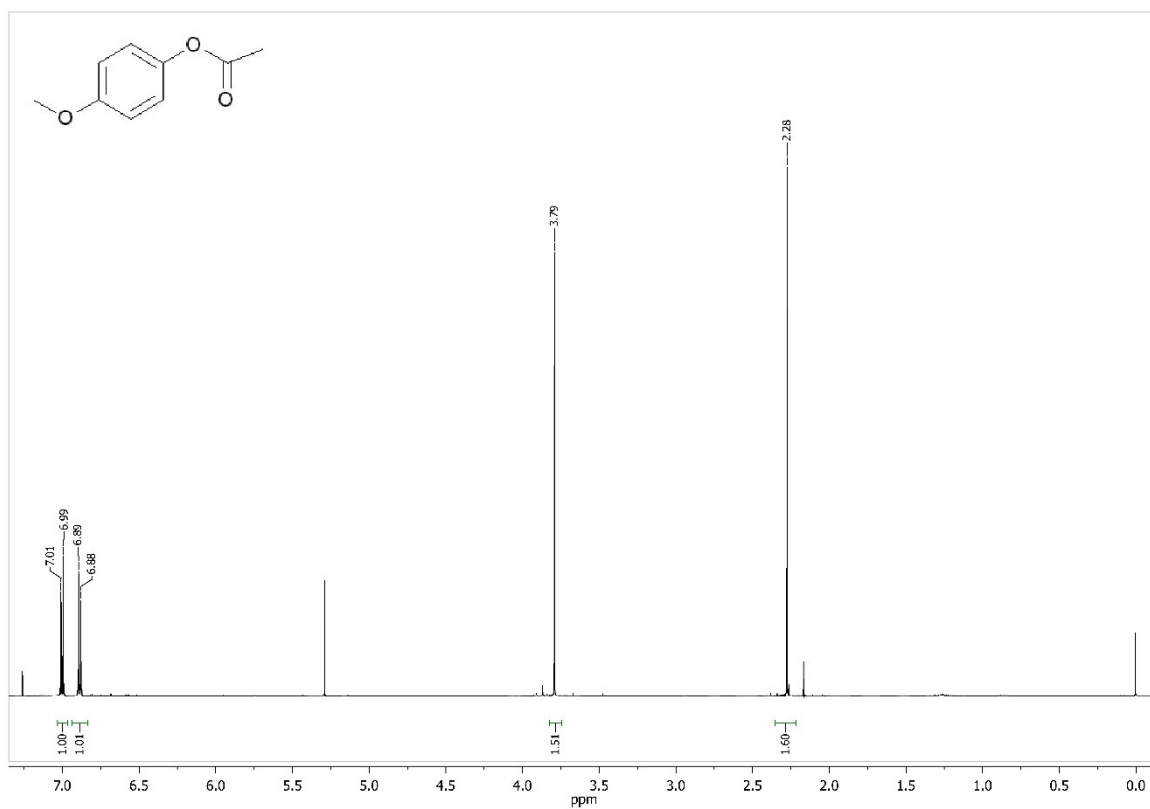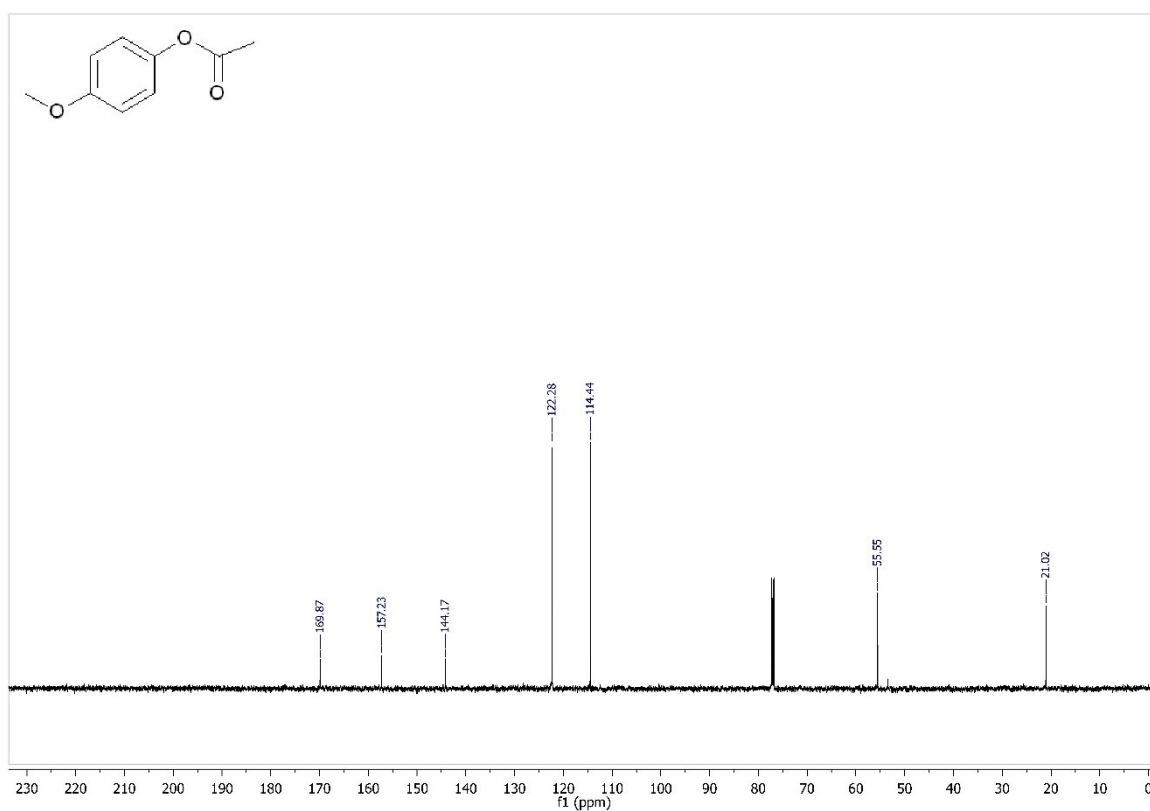

Supplement: c6ra03435g1.pdf [file c6ra03435g1.pdf]
